# Supplementary material
Source: PubMed Central journal article supplement (PMC3495124)
Supplement: Supp_Fig1.pdf [file Supp_Fig1.pdf]

## Supplementary Data

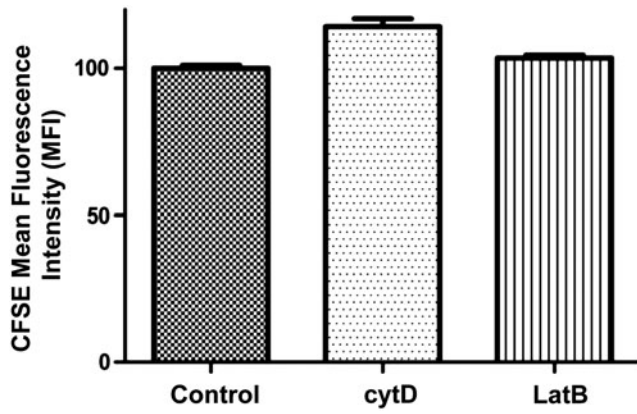

SUPPLEMENTARY FIG. S1. Proliferation assay. Graph showing mean fluorescent intensity represents the cell proliferation in control, cytochalasin D (1  $\mu$ M) and latrunculin B (0.5  $\mu$ M)-treated 5,6-carboxyfluorescein diacetate succinimidyl ester-labeled mesenchymal stem cells;  $n=2$ .
